# Supplementary figures and images for: Hemolytic Properties of Fine Particulate Matter (PM2.5) in In Vitro Systems
Source: MDPI journal article supplement (doi:10.3390/toxics12040246), 2024-03-27

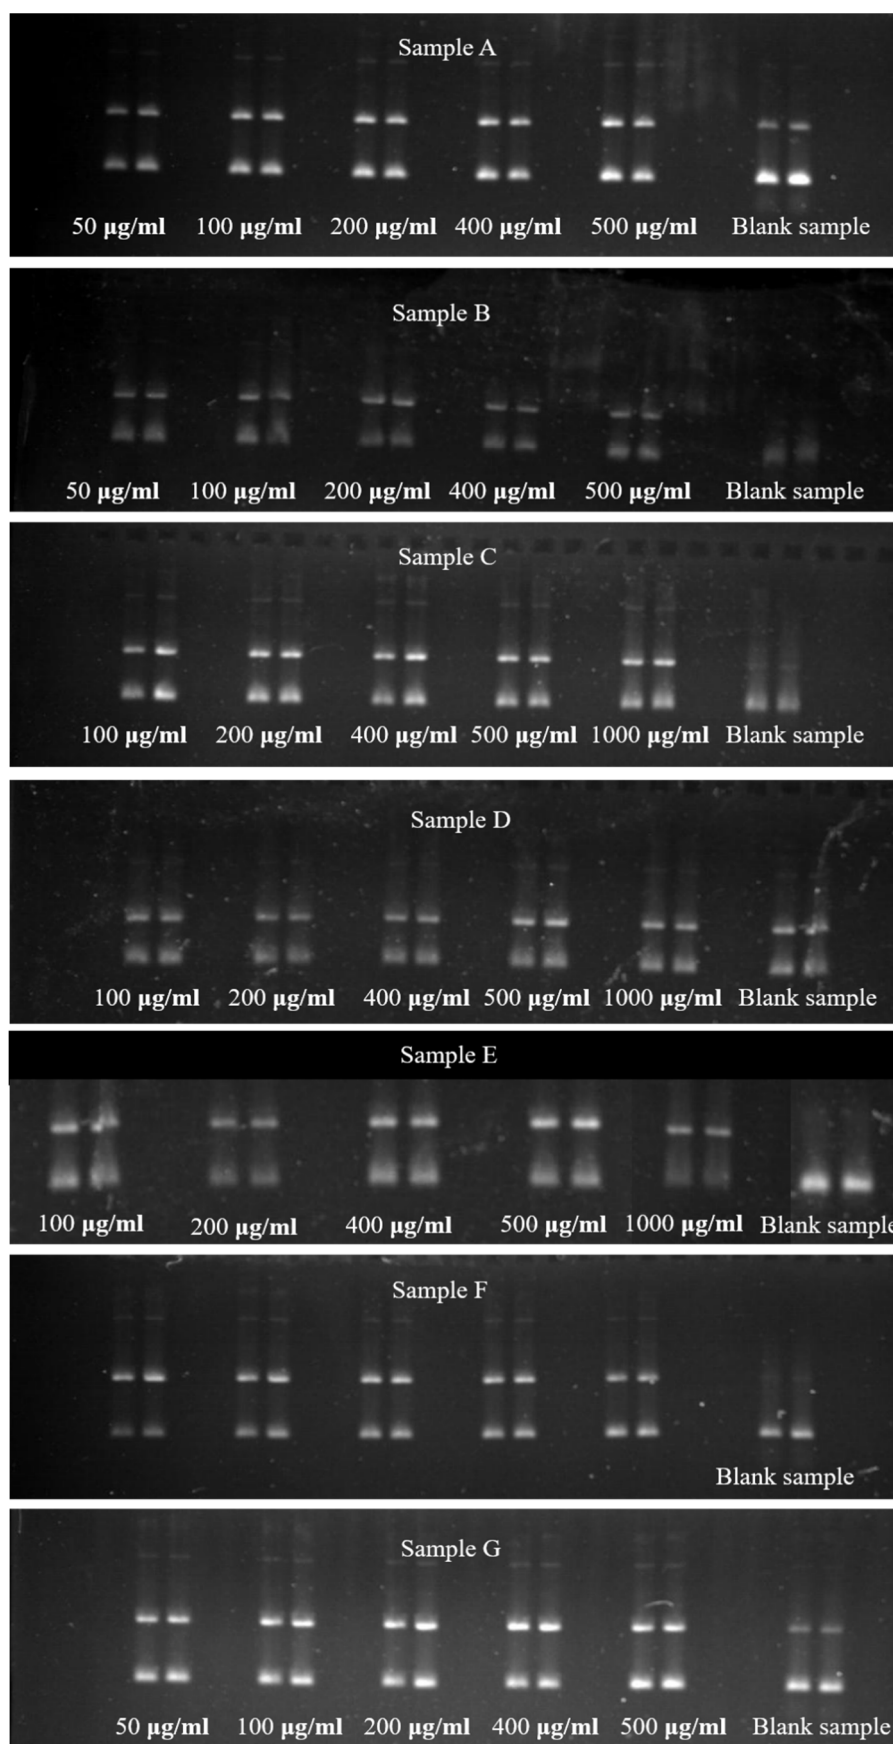

Figure S1 Chromatograms of electrophoretic by PSA

Supplement: s1 [file s1]
